# Supplementary material for: HIV testing uptake and yield among sexual partners of HIV-positive men who have sex with men in Zhejiang Province, China, 2014-2016: A cross-sectional pilot study of a choice-based partner tracing and testing package
Source: PubMed Central journal article supplement (PMC7272034; doi:10.1371/journal.pone.0232268), 2020-06-04
Supplement: pone.0232268.s003.pdf [file pone.0232268.s003.pdf]

Table 4: HIV testing uptake by modes in different types of sexual relationship among reachable sexual partners of newly diagnosed HIV positive MSM in June 2014 through June 2016, in Hangzhou and Ningbo Cities, China.

| Type(s) of sexual relationship with sexual partners                  | Modes of partner tracing and testing package | Tested    | Not tested | $\chi^2$ | <i>p</i> -value |
|----------------------------------------------------------------------|----------------------------------------------|-----------|------------|----------|-----------------|
| Stable, non-commercial same-sex relationship/<br>opposite-sex spouse | CHCT                                         | 120(88.2) | 16(11.8)   | 2.827    | 0.419           |
|                                                                      | IAPN                                         | 56(94.9)  | 3(5.1)     |          |                 |
|                                                                      | HIVST                                        | 10(90.9)  | 1(9.1)     |          |                 |
|                                                                      | Patient Referral                             | 80(93.0)  | 6(7.0)     |          |                 |
| Casual, non-commercial same-sex relationship                         | CHCT                                         | 39(68.4)  | 18(31.6)   | -        | <0.001          |

| Type(s) of sexual relationship with sexual partners                               | Modes of partner tracing and testing package | Tested   | Not tested | $\chi^2$ | <i>p</i> -value |
|-----------------------------------------------------------------------------------|----------------------------------------------|----------|------------|----------|-----------------|
| Commercial same-sex relationship /<br>Unmarried opposite-sex relationship/ Others | IAPN                                         | 89(93.7) | 6(6.3)     | -        | 0.392           |
|                                                                                   | HIVST                                        | 5(100.0) | 0(0.0)     |          |                 |
|                                                                                   | Patient Referral                             | 67(87.0) | 10(13.0)   |          |                 |
|                                                                                   | CHCT                                         | 3(75.0)  | 1(33.3)    |          |                 |
|                                                                                   | IAPN                                         | 1(100.0) | 0(0.0)     |          |                 |
|                                                                                   | HIVST                                        | -        | -          |          |                 |
|                                                                                   | Patient Referral                             | 6(75.0)  | 2(25.0)    |          |                 |

OR: Odds Ratio; CI: Confidence Interval; Neg: negative HIV test; Pos: positive HIV test; CHCT: couples' HIV testing and counseling; IAPN: Information assisted partner notification; HIVST: assisted HIV self-testing
